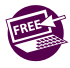

# Erratum

**Reduction in Carotid Intima-Media Thickness After Pancreatic Islet Transplantation in Patients With Type 1 Diabetes. *Diabetes Care* 2013;36:450–456**

DOI: 10.2337/dc14-er02c

In the print version of the article listed above, the following sentence should have been included in the Acknowledgments section: “This study was also supported by grant K12HD055892 from the National Institute of Child Health and Human Development and the National Institutes of Health Office of Research on Women’s Health.” The online version reflects these changes.

*Kirstie K. Danielson, Betul Hatipoglu, Katie Kinzer, Bruce Kaplan, Joan Martellotto, Meirigeng Qi, Alessandra Mele, Enrico Benedetti, and José Oberholzer*
